# Supplementary material for: Contribution of the Sensitivity Analysis in Groundwater Vulnerability Assessing Using the DRASTIC and Composite DRASTIC Indexes
Source: Copernicus journal article supplement (doi:10.5194/nhess-2019-181), 2019-07-08
Supplement: Supplementary file [file nhess-2019-181-RC2-supplement.pdf]

Assessment

1 **Contribution of the Sensitivity Analysis in Groundwater Vulnerability Assessing Using the**

2 **DRASTIC and Composite DRASTIC Indexes**

3 Mohammad Malakootian<sup>1</sup>, Majid Nozari<sup>2\*</sup>

4 **Manuscript Authors details:**

5 1. Mohammad Malakootian, Department of Environmental Health, School of Public Health,  
6 Kerman University of Medical Sciences, Iran. E-mail: m.malakootian@yahoo.com.

7 <https://orcid.org/0000-0002-4051-6242>.

8 2. Majid Nozari, Department of Environmental Health, School of Public Health, Kerman  
9 University of Medical Sciences, Iran. Tel: 98-9383921819, E-mail: nozari.m@kmu.ac.ir.

10 <https://orcid.org/0000-0003-2319-1930>.

~~11~~

~~12~~

~~13~~

~~14~~

~~15~~

~~16~~

~~17~~

~~18~~

~~19~~

~~20~~

~~21~~

~~22~~

23 **ABSTRACT**

24 The present study estimates Kerman–Baghin aquifer vulnerability by applying the DRASTIC  
25 and composite DRASTIC (CDRASTIC) indexes. The factors affecting the transfer of  
26 contamination, including ~~the~~ water table depth, ~~the~~ soil media, ~~the~~ aquifer media, ~~the~~ impact of  
27 the vadose zone, ~~the~~ topography, ~~the~~ hydraulic conductivity, and ~~the~~ land use, were ranked,  
28 weighted, and integrated, using a geographical information system (GIS). A sensitivity test has  
29 also been performed to specify the sensitivity of the parameters. The study results show that the  
30 topographic layer displays a gentle slope in the aquifer. The majority of the aquifer covered  
31 irrigated field crops and grassland with a moderate vegetation cover. In addition, the aquifer  
32 vulnerability maps indicate very similar results, recognizing the northwest parts of the aquifer as  
33 areas with high <sup>TO</sup> and very high vulnerability. The map removal sensibility analysis (MRSA)  
34 revealed <sup>THAT</sup> ~~the~~ impact of the vadose zone (in the DRASTIC index) and hydraulic conductivity (in  
35 the CDRASTIC index) as the most effective <sup>important!</sup> parameters in the vulnerability evaluation. In both  
36 indexes, the single-parameter sensibility analysis (SPSA) showed the net recharge as the most  
37 effective factor in the vulnerability estimation. From this study, it can be concluded that  
38 vulnerability maps can be used as a tool to control human activities for the sustained protection  
39 of aquifers.

PROTECTION AND  
Sustainable usage

40  
41 **Keywords:** Vulnerability; Sensitivity analyses; DRASTIC; Composite DRASTIC; Kerman–  
42 Baghin aquifer

43

44

45

46

47 **1. Introduction**

48 Groundwater is ~~as~~ a significant and principal freshwater resource in most parts of the world,  
49 especially for ~~those in~~ waterless and arid areas. Water quality has been given more emphasis <sup>in</sup> on  
50 groundwater management (Neshat et al., 2014; Manap et al., 2013; Manap et al., 2014a; Ayazi et  
51 al., 2010). The potential groundwater's <sup>HUMAN ACTIVITIES</sup> contamination by ~~mankind operations~~ at or near the  
52 surface of the groundwater has been supposed the major base for control of this source (Tilahun  
53 and Merkel, 2010). *not clear - very weird expressions*

54 The introduction of potential contaminants to a location on top of an aquifer at a specific  
55 location in an underground system is defined as groundwater vulnerability (Sarah and Patricia,  
56 1993; Neshat et al., 2014). Groundwater vulnerability is an evaluation of the groundwater  
57 <sup>not clear</sup> pollution relative hazard <sup>define it again?</sup> by a specific constituent. Vulnerability maps are commonly performed  
58 at <sup>THE</sup> a sub-basin, basin, or regional scale. They are not normally applied for site-specific  
59 evaluations including zones smaller than a few tens of square kilometers (Baalousha, 2006;  
60 Tilahun and Merkel, 2010). Different techniques have been <sup>developed</sup> presented to assess groundwater  
61 susceptibility with great precision (Javadi et al., 2010; Javadi et al., 2011). Mostly, <sup>of THE</sup> these methods  
62 <sup>is based on</sup> include analytic tools <sup>considered</sup> to relate groundwater contamination <sup>with</sup> land operations.

63 There are three types of <sup>?</sup> evaluation methods: <sup>TO</sup> the overlay and index <sup>approaches</sup> and the process-based simulations  
64 and, <sup>THE TWO LATTER METHODS WERE</sup> the statistic procedures (Neshat et al., 2014; Dixon, 2004). <sup>NOT discussed in subsequent texts, consider</sup>

65 Overlay and index procedures affirm the incorporation of various zonal maps by <sup>TO REMOVE</sup> allocating  
66 a numeral index. Both procedures are simple to use in the geographic information system,  
67 especially on a zonal measure. Hence, these methods are the most famous procedures applied to  
68 vulnerability estimation (Neshat et al., 2014). The most extensively used methods for the  
69 groundwater's vulnerability evaluation are GODS (Ghazavi and Ebrahimi, 2015), IRISH (Daly

70 and Drew, 1999), AVI (Raju et al., 2014), and DRASTIC (Neshat et al., 2014; Baghapour et al.,  
71 2014; Baghapour et al., 2016).

72 The DRASTIC index, ~~for the first time~~ proposed by Aller et al (1985), <sup>CS</sup> it is considered one of  
73 the best indexes for the groundwater vulnerability estimation. This method ignores the influences  
74 of zonal properties. Thus, identical weights and rating values are utilized. In addition, this  
75 technique does not apply a standard validation test for the aquifer. Therefore, several  
76 investigators developed this index using various techniques (Neshat et al., 2014). The higher  
77 DRASTIC index represents the greater contamination potential and inversely. After calculating  
78 the DRASTIC index, it should be possible to identify the zones that are more prone to pollution.  
79 This index only provides a relative estimation and is not created to make a complete assessment  
80 (Baalousha, 2006).

81 Many studies have been conducted using DRASTIC index to estimate the groundwater  
82 vulnerability in different regions of the world (Jaseela et al., 2016; Zghibi et al., 2016; Kardan  
83 Moghaddam et al., 2017; Kumar et al., 2016; Neshat and Pradhan, 2017; Souleymane and Tang,  
84 2017; Ghosh and Kanchan, 2016; Saida et al., 2017), however, <sup>a</sup>fewer studies have used the  
85 CDRASTIC index for evaluation of the groundwater vulnerability (Baghapour et al., 2016; <sup>There are still a number of studies</sup>  
86 Baghapour et al., 2014; Secunda et al., 1998; Jayasekera et al., 2011; Shirazi et al., 2012;  
87 Jayasekera et al., 2008). Boughriba et al. (2010) utilized DRASTIC index in geographical  
88 information system environment for an estimation of the aquifer vulnerability. They provide the  
89 DRASTIC modified map prepared from total DRASTIC indexes and small monitoring network  
90 maps including two classes, high and medium. Then, authors integrated the map with the land  
91 use map to provide the contamination potential map. They reported that the new obtained  
92 groundwater vulnerability map including three various classes very high, high, and medium.

93 Babiker et al. (2005) used the DRASTIC index to determine prone points to contamination from  
94 human activities in the aquifer. They reported that **in terms of vulnerability**, the western and  
95 eastern parts of **the** aquifer fall in the high and medium **classes**, respectively. The final aquifer  
96 vulnerability map represents that the high risk of pollution is in the eastern part of aquifer due to  
97 agriculture activities. They also observed that the factor, net recharge has the **biggest** effect on  
98 the aquifer vulnerability, followed by the soil media, **the** topography, the impact of the vadose  
99 zone, and **the** hydraulic conductivity.

100 The water **scarcity** in Iran, with a mean annual rainfall <sup>of only</sup> about one-third of the world's annual <sup>average</sup>  
101 rainfall (Chitsazan and Akhtari, 2006; Modabberi et al., 2017), is a very critical and serious  
102 problem. Also, **the groundwater reduction makes** ~~worst~~ <sup>even worse</sup> **the previous problem**. Groundwater is the  
103 only **freshwater resource** in the Kerman **province**, due to the lack of surface water. **The aquifer**  
104 ~~object of this research~~ <sup>is</sup> located in the central part of Kerman province <sup>in</sup> Iran. Due to recent  
105 droughts, this aquifer is placed under heavy pumping to irrigate crops, which cause <sup>a gradual</sup> ~~gradually~~ **the**  
106 **drop of** the water level. ~~Moreover, recently, the use of groundwater resources has been greater~~  
107 ~~than in former years.~~ **It makes the studies on the pathology and zoning the damages in**  
108 **groundwater undeniable**. Therefore, the purpose of this research is <sup>to provide for</sup> ~~providing~~ the Kerman-  
109 Baghin aquifer <sup>a</sup> **vulnerability maps** and performing <sup>a</sup> ~~the~~ sensitivity analysis to identify the most  
110 <sup>influential</sup> ~~effective~~ factors in the vulnerability **assessment**.

## 111 2. Methodology

### 112 2.1. Study area

113 The Kerman Province covers both semiarid and waterless areas. The present study included a  
114 2023 km<sup>2</sup> area (29° 47' to 30° 31' N latitude and 56° 18' to 57° 37' E longitude) located in the  
115 central part of the Kerman Province, Iran (**Fig.1**). The study area is mostly covered by

116 agricultural land (Neshat et al., 2014). In the study area, the mean annual rainfall is 108.3 mm  
 117 (during 2017); the highest and lowest topographic elevation is 1,980 and 1,633 m above sea  
 118 level; and eventually, the mean, minimum, and maximum annual temperatures are 17°C, -12°C,  
 119 and 41°C, respectively (during 2017).

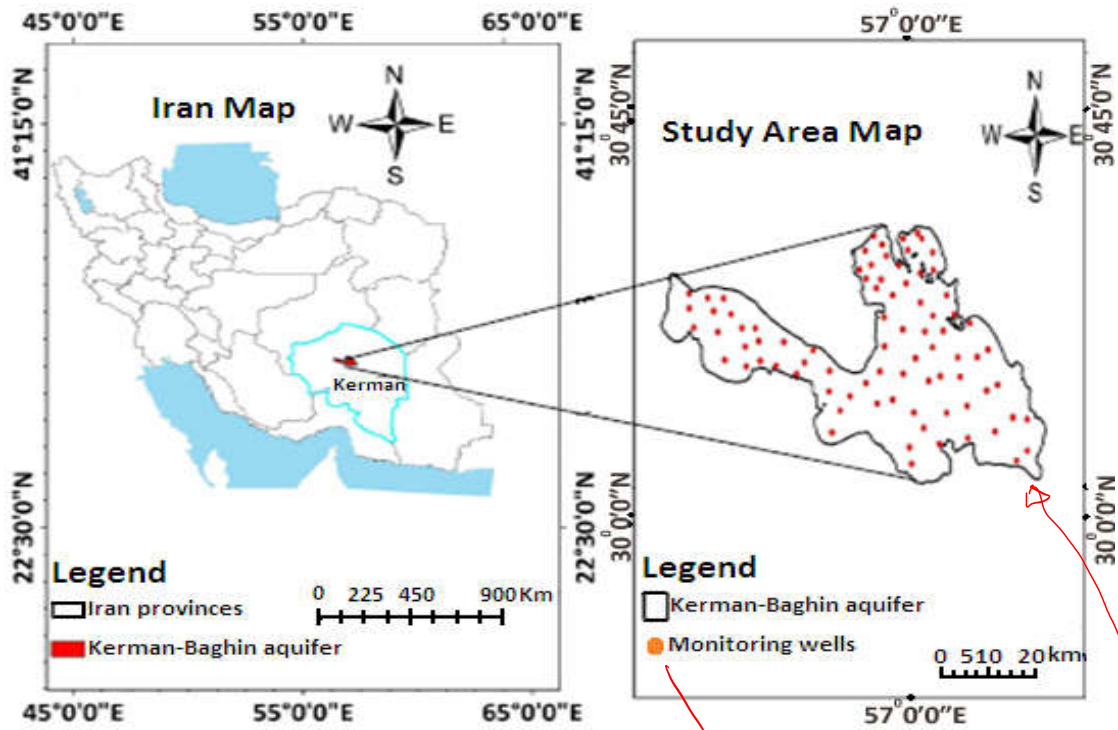

120  
 121 **Fig. 1.** Location map of the Kerman–Baghin aquifer *Should this be "red" color?*

122 **2.2. Computing the DRASTIC and CDRASTIC indexes**

123 DRASTIC is a procedure developed by the United States Environmental Protection Agency (U.S  
 124 EPA) to evaluate the groundwater pollution (Aller et al., 1985). Higher DRASTIC index  
 125 corresponds to high vulnerability of the aquifer to pollution. Vulnerability ranges corresponding  
 126 to the DRASTIC index are presented in Tab 1. In the DRASTIC index, each parameter is rated  
 127 on a scale from 1 to 10 that shows the relative contamination potential of that parameter for that  
 128 area. Also, in the DRASTIC index, one weight (1 to 5) is assigned to each of the parameters.

6 *This part should appear after  
 The definition of DRASTIC*

129 Weight values show the relative significance of the parameters with respect to each other. The  
 130 DRASTIC index is obtained using the following formula (Kardan Moghaddam et al., 2017;  
 131 Neshat and Pradhan, 2017):

$$132 \text{ DRASTIC index} = D_r D_w + R_r R_w + A_r A_w + S_r S_w + T_r T_w + I_r I_w + C_r C_w \quad (1)$$

133 In the above formula, the letters in the acronym DRASTIC comprise a short form of the effective  
 134 factors in the DRASTIC index. D, R, A, S, T, I, and C are the water table depth, the net recharge,  
 135 the aquifer media, the soil media, the topography, the impact of the vadose zone, and the  
 136 hydraulic conductivity, respectively. Also, “r” and “w” are the rating and weight of each factor,  
 137 respectively. The ratings and weights of the factors are depicted in Tab 2.

138 **Table 1** The range of vulnerability related to the DRASTIC index

| Vulnerability | Ranges  |
|---------------|---------|
| Very low      | 23-46   |
| Low           | 47-92   |
| Moderate      | 93-136  |
| High          | 137-184 |
| Very high     | >185    |

*How do you determine these values?  
 Provide supporting material or reference.*

139

140 **Table 2** Rating and weight-related to DRASTIC index factors

| DRASTIC parameters           | Range     | Rating (r) | Weight (w) |
|------------------------------|-----------|------------|------------|
| <b>Water table depth (m)</b> | 0.0-1.5   | 10         | 5          |
|                              | 1.5-4.6   | 9          |            |
|                              | 4.6-9.1   | 7          |            |
|                              | 9.1-15.2  | 5          |            |
|                              | 15.2-22.9 | 3          |            |
|                              | 22.9-30.5 | 2          |            |
|                              | >30.5     | 1          |            |
| <b>Net recharge</b>          | 11-13     | 10         | 4          |
|                              | 9-11      | 8          |            |
|                              | 7-9       | 5          |            |
|                              | 5-7       | 3          |            |
|                              | 3-5       | 1          |            |

|                                       |                              |    |   |
|---------------------------------------|------------------------------|----|---|
| <b>Aquifer media</b>                  | Rubble and sand              | 9  | 3 |
|                                       | Gravel and sand              | 7  |   |
|                                       | Gravel, sand, clay, and silt | 5  |   |
|                                       | Sand and clay                | 4  |   |
|                                       | Sand, clay, and silt         | 3  |   |
| <b>Soil media</b>                     | Rubble, sand, clay, and silt | 9  | 2 |
|                                       | Gravel and sand              | 7  |   |
|                                       | Gravel, sand, clay, and silt | 6  |   |
|                                       | Sand                         | 5  |   |
|                                       | Sand, clay, and silt         | 3  |   |
| <b>Topography or slope (%)</b>        | 0-2                          | 10 | 1 |
|                                       | 2-6                          | 9  |   |
|                                       | 6-12                         | 5  |   |
|                                       | 12-18                        | 3  |   |
|                                       | >18                          | 1  |   |
| <b>The impact of the vadose zone</b>  | Rubble, sand, clay, and silt | 9  | 5 |
|                                       | Gravel and sand              | 7  |   |
|                                       | Gravel, sand, clay, and silt | 5  |   |
|                                       | Sand, clay, and silt         | 3  |   |
| <b>Hydraulic conductivity (m/day)</b> | 0-4.1                        | 1  | 3 |
|                                       | 4.1-12.2                     | 2  |   |
|                                       | 12.2-28.5                    | 4  |   |
|                                       | 28.5-40.7                    | 6  |   |
|                                       | 40.7-81.5                    | 8  |   |

141

142 To get the CDRASTIC index, an additional factor (land use) is added to the above formula.

143 Thus, the CDRASTIC index was obtained as follows:

144 
$$\text{CDRASTIC index} = D_r D_w + R_r R_w + A_r A_w + S_r S_w + T_r T_w + I_r I_w + C_r C_w + L_r L_w \quad (2)$$

145 *where*  
~~In the above formula,~~  $L_w$  and  $L_r$  are the relative weight and rating related to the land use factor,

146 respectively. Ratings and weightings applied to the pollution potential, which are related to the land

147 use factor based on the CDRASTIC index, are indicated in **Tab 3**. **The CDRASTIC formula final**

148 **outputs are ranged from 28 to 280**. Vulnerability ranges based on the CDRASTIC index are

149 presented in **Tab 4**.

150 **Table 3** Ratings and weighting applied to the pollution potential related to the land use factor

151 based on the CDRASTIC index *How do you define the values?*



| Land use                                                                       | Rating | Weight |
|--------------------------------------------------------------------------------|--------|--------|
| Irrigated field crops + Urban areas                                            | 10     |        |
| Irrigated field crops + Grassland with poor vegetation cover + Urban areas     | 9      |        |
| Irrigated field crops + Grassland with moderate vegetation cover + Urban areas | 8      |        |
| Irrigated field crops                                                          | 8      |        |
| Irrigated field crops + Fallow land + Grassland with poor vegetation cover     | 7      |        |
| Irrigated field crops + Grassland with poor vegetation cover                   | 7      |        |
| Irrigated field crops + Grassland with moderate vegetation cover               | 6      |        |
| Irrigated field crops + Rocky + Urban areas                                    | 5      | 5      |
| Irrigated field crops + Grassland with poor vegetation cover + Woodland        | 5      |        |
| Irrigated field crops + Woodland                                               | 5      |        |
| Irrigated field crops + Rocky                                                  | 4      |        |
| Fallow land                                                                    | 3      |        |
| Fallow land + Grassland with poor vegetation cover                             | 3      |        |
| Fallow land + Grassland with moderate vegetation cover                         | 3      |        |
| Grassland with poor vegetation cover                                           | 2      |        |
| Grassland with moderate vegetation cover                                       | 2      |        |
| Grassland with moderate vegetation cover + Woodland                            | 1      |        |
| Sand dune +Grassland with moderate vegetation cover                            | 1      |        |
| Sand dune                                                                      | 1      |        |

152

153 **Table 4** Vulnerability ranges related to the CDRASTIC index

| Vulnerability | Ranges  |
|---------------|---------|
| Very low      | <100    |
| Low           | 100-145 |
| Moderate      | 145-190 |
| High          | 190-235 |
| Very high     | ≥235    |

154 **2.3. Water table depth**

155 The water table depth factor is the distance of water table from the Earth's surface, in a well  
156 (Baghapour et al., 2016). 83 wells in the Kerman–Baghin aquifer were utilized to obtain this  
157 factor. The interpolation procedure was used to provide a raster map of the water table depth  
158 factor, which was categorized based on Tab 2.

159 **2.4. Net recharge**

160 Net recharge is the amount of runoff that permeates into the ground and reaches the groundwater  
 161 surface (Singh et al., 2015; Ghosh and Kanchan, 2016). This research uses the Piscopo method  
 162 (Chitsazan and Akhtari, 2009) to provide the net recharge layer for the Kerman–Baghin aquifer  
 163 according to the following equation and Tab 5:

164 
$$\text{Net recharge factor} = \text{slope (\%)} + \text{rainfall} + \text{soil permeability.} \quad (3)$$

165 In the above equation, the percentage of slope was calculated from a topographical map, using a  
 166 digital elevation model. Also, a soil permeability map was created using the Kerman–Baghin  
 167 aquifer soil map (with scale 1:250000) and the drilling logs of the 83 wells. In the end, a map of  
 168 the area’s rainfall rate was compiled based on the annual average precipitation. Ratings and  
 169 weights of the net recharge factor are illustrated in Tab 5.

170 **Table 5** Weight, rating, and range of the net recharge parameter

| Slope (%) |        | Rainfall        |        | Soil permeability |        | Net Recharge    |        |        |
|-----------|--------|-----------------|--------|-------------------|--------|-----------------|--------|--------|
| Range (%) | Factor | Range (mm/year) | Factor | Range             | Factor | Range (cm/year) | Rating | Weight |
| <2        | 4      | >850            | 4      | High              | 5      | 11-13           | 10     | 4      |
| 2-10      | 3      | 700-850         | 3      | Moderate to high  | 4      | 9-11            | 8      |        |
| 10-33     | 2      | 500-700         | 2      | Moderate          | 3      | 7-9             | 5      |        |
| >33       | 1      | <500            | 1      | Low               | 2      | 5-7             | 3      |        |
|           |        |                 |        | Very low          | 1      | 3-5             | 1      |        |

171 **2.5. Aquifer media**

172 **Aquifer media** parameter controls the path of groundwater streams in the aquifer (Aller et al.,  
 173 1985; Singh et al., 2015). To obtain this layer, the 83 well’s drilling log data were used. The data  
 174 were gathered from the Kerman Regional Water Office (KRWO). The range of the aquifer media  
 175 layer is shown in Tab 2.

176 **2.6. Soil media**

177 The soil media has a considerable effect on the amount of water surface that can penetrate into  
178 the aquifer. Therefore, where the soil layer is thick, the debilitation processes such as absorption,  
179 filtration, degradation, and evaporation may be considerable (Singh et al., 2015). A soil media  
180 raster map was provided using the Kerman–Baghin aquifer soil map and the well’s drilling logs.

## 181 2.7. Topography

182 The topography controls the residence time of water inside on the soil and the degree of  
183 penetration (Singh et al., 2015). For obtain this layer, the percentage of the slope was provided  
184 from the topographical map, using a digital elevation model. The data were gathered from the  
185 KRWO. The range of the topographic layer is presented in Tab 2.

## 186 2.8. The impact of the vadose zone

187 The vadose zone is the unsaturated area located between the topographic surface and the  
188 groundwater level (Singh et al., 2015). It plays a considerable role in decreasing groundwater  
189 contamination by pollutant debilitation processes such as purification, chemical reaction, and  
190 dispersal (Shirazi et al., 2012). *what do you mean?*  
In order to prepare this layer, the wells drilling log data were  
191 used. The data were gathered from the KRWO. The impact range of the vadose zone layer is  
192 depicted in Tab 2.

## 193 2.9. Hydraulic conductivity

194 The hydraulic conductivity refers to the capability of the aquifer to transfer water. The high  
195 hydraulic conductivity areas demonstrate a high potential for groundwater contamination (Singh  
196 et al., 2015; Aller et al., 1985). To prepare this layer, data derived from pumping tests of wells  
197 were used. The range of the hydraulic conductivity layer is shown in Tab 2.

## 198 2.10. Land use

199 Land use influences groundwater resources via variation in recharge amount and by changing  
200 freshwater demands for water. Land use is obligatory since it is required by the CDRASTIC  
201 index. The Indian remote sensing satellite information was utilized to providing land use raster  
202 map. The weight and rating related to the land use layer are presented in Tab 3.

## 203 2.11. Sensitivity Analyses

204 One of the main advantages of the DRASTIC index is the evaluation performance because of  
205 high number of input data are used, this allows to restrict the effects of errors on the final results.  
206 Nevertheless, some investigators, like Babiker et al. (2005), Barber et al. (1993), and Merchant  
207 (1994), reported that similar results could be obtained using fewer data and lower costs. The  
208 unavoidable subjectivity related to the choice of the seven factors, ranks, and weights utilized to  
209 calculate the vulnerability index has also been criticized. Therefore, in order to eliminate the  
210 aforementioned criticisms, two sensitivity analyses were performed as follows (Napolitano and  
211 Fabbri, 1996):

### 212 A. Map removal sensibility analysis (MRSA)

213 MRSA value indicates the vulnerability map sensibility to removal one or more maps from the  
214 suitability analysis. MRSA is calculated as follows (Babiker et al., 2005; Martínez-Bastida et al.,  
215 2010; Saidi et al., 2011; Modabberi et al., 2017):

$$216 \quad S = \left[ \left| \frac{\frac{V}{N} - \frac{V'}{n}}{V} \right| \right] \times 100 \quad (4)$$

217 S is the sensibility value expressed in terms of variation index, V is the intrinsic vulnerability  
218 index (real vulnerability index) and V' is the intrinsic vulnerability index after removal of factor

219 X, N and n are the numbers of data factors utilized to calculate V and V', respectively (Babiker et  
220 al., 2005; Martínez-Bastida et al., 2010; Saidi et al., 2011; Modabberi et al., 2017).

## 221 **B. Single-parameter sensibility analysis (SPSA)**

222 SPSA was presented by Napolitano and Fabbri (1996) for the first time. This test shows the  
223 effect of each of the DRASTIC factors in the final vulnerability index. Using this test derived  
224 from equation 5, the real and effective weight of each factor, compared to the theoretical weight  
225 assigned by the analytical model was calculated (Babiker et al., 2005; Martínez-Bastida et al.,  
226 2010; Saidi et al., 2011; Modabberi et al., 2017),

$$227 \quad W = \left[ \frac{P_r P_w}{V} \right] \times 100 \quad (5)$$

lower case

228 ~~u~~Where W is the effective weight of each factor. P<sub>r</sub> and P<sub>w</sub> are the rank and weight assigned to  
229 factor P, respectively. V is the intrinsic vulnerability index (Martínez-Bastida et al., 2010;  
230 Babiker et al., 2005; Saidi et al., 2011; Modabberi et al., 2017).

no comma

## 231 **3. Results and discussion**

### 232 **3.1. DRASTIC and CDRASTIC parameters**

233 Based on the data shown in Tab 2, the assigned rating of water table depth varies from 1 to 10. In  
234 addition, based on the results presented in Tab 6, the water table depth in the aquifer varies from  
235 4.6 to >30.5 m (rating 1 to 7). Around 27.55% of the aquifer has a depth greater than 30.5 m, and  
236 66.16 % of the aquifer has a depth ranging from 9.1 m and 30.5 m. Less than 7% has a depth  
237 between 4.6 m and 9.1 m. The Kerman–Baghin aquifer rated map of water table depth factor is  
238 presented in Fig 2(A). According to Fig 2(A) and Tab 6, the minimum impact of the water table  
239 depth parameter on aquifer vulnerability occurs in the central parts (6.39%), whereas the  
240 maximum impact occurs in the north, south, northwest, and southeast parts (27.55%).

241 According to the results presented in Tab 6, 75.81% of the aquifer has a net recharge value in  
242 the range of 7 to 9 cm/year. 11.74% of the aquifer has a net recharge value between 9 and 11  
243 cm/year. The Kerman–Baghin aquifer rated map of the net recharge parameter is shown in Fig  
244 2(B). According to Piscopo's method, the Kerman–Baghin aquifer was divided into three classes,  
245 with regards to the net recharge factor. The highest net recharge value was seen in the north,  
246 northeast, south, southwest, parts of the northwest, parts of the center, and parts of the southeast  
247 (75.81%), whereas the least net recharge value appeared in parts of the northwest and center  
248 (11.74%), as shown in Fig 2(B) and Tab 6.

249 As observed in Tab 6, the majority of the Kerman–Baghin aquifer media is composed of sand,  
250 clay, and silt (75.21%). The Kerman–Baghin aquifer rated map of aquifer media is presented in  
251 Fig 3(A). Parts of the aquifer in the north, northwest, northeast, center, and southeast are  
252 composed of sand, clay, and silt. Parts of the aquifer in the northwest are composed of rubble and  
253 sand (5.58%). Parts of the aquifer in the south and northwest are composed of gravel and sand  
254 (8.95%), and gravel, sand, clay, and silt (10.26%).

255 The Kerman–Baghin aquifer rated map of the soil media parameter is presented in Fig 3(B).  
256 The soil map depicts six different classes of the soil. The highest rank (rank = 9) was assigned to  
257 rubble, sand, clay, and silt (a combination of rubble, sand, clay and silt soils). Also, the lowest  
258 rank (rank = 2) was assigned to clay and silt (a combination of clay and silt soils). Most of the  
259 aquifer soil media is covered with silt, sand, and clay (about 80%).

260 The Kerman–Baghin aquifer rated map of the topography parameter is indicated in Fig 4(A).  
261 The topographical layer shows a gentle slope (0 to 6%) over most of the aquifer, hence gaining  
262 ranks of 9 and 10. A slope range of 0 to 2% includes 34.72% of the study area, and its rating  
263 (slope range = 0–2%) is 10. Also, 65.28% of the aquifer has a slope range of 2 to 6% (parts of

264 the northwest) as shown in Fig 4(A) and Tab 6. As the gradient increases, the runoff increases as  
265 well (Israil et al., 2006) leading to less penetration (Jaiswal et al., 2003). Based on Madrucci et  
266 al. (2008), the gradients higher than 35° are considered restrictions on groundwater desirability  
267 because of the lack of springs.

268 The Kerman–Baghin aquifer rated map of the impact of the vadose zone parameter is  
269 indicated in Fig 4(B). According to the results, the soil with a rank of 5 (gravel, sand, clay, and  
270 silt) is more effective on aquifer vulnerability (35.47%). Other various types of soils such as  
271 sand, clay, and silt (parts of the north, northeast, south, and southeast), gravel and sand (parts of  
272 the center and northwest), and rubble, sand, clay, and silt (parts of the northwest) cover 34.24%,  
273 20.39%, and 9.9% of the aquifer, respectively, as shown in Fig 4(B) and Tab 6. Sandy soil is  
274 effective on groundwater occurrence because of the high rate of penetration (Srivastava and  
275 Bhattacharya, 2006). However, clay soil is arranged poorly because of the low infiltration  
276 (Manap et al., 2014b).

277 The Kerman–Baghin aquifer rated map of the hydraulic conductivity parameter is presented  
278 in Fig 5(A). The hydraulic conductivity factor shows high variability. Our study results show that  
279 the hydraulic conductivity parameter of the Kerman–Baghin aquifer varied from 0 to 81.5 m/day.  
280 The potential for groundwater contamination greater in zones with high hydraulic conductivity  
281 (38.27%). As shown in Fig 5(A) and Tab 6, 29.51%, 23.93%, 5.98%, and 2.31% of the study  
282 areas have hydraulic conductivity in the ranges of 0 to 4.1 m/day, 12.2 to 28.5 m/day, 28.5 to  
283 40.7 m/day, and 40.7 to 81.5 m/day, respectively.

284 The Kerman–Baghin aquifer rated map of the land use parameter is presented in Fig 5(B).  
285 Our results show that the majority of the Kerman–Baghin aquifer is covered with irrigated field  
286 crops and grassland with moderate vegetation cover (20.45%). Less than 4% of the study area is

287 irrigated field crops and urban areas (3.61%), and 58.47% of the study area is irrigated field  
288 crops with urban areas, grassland with poor and moderate vegetation cover, fallow land,  
289 woodland, and rocky ground. In addition, 10.17% of the study area is fallow land with poor  
290 grassland and moderate vegetation cover, and 13.72% of the study area is sand dunes with poor  
291 grassland and moderate vegetation cover and woodland as shown in Fig 5(B) and Tabs 3 and 6.

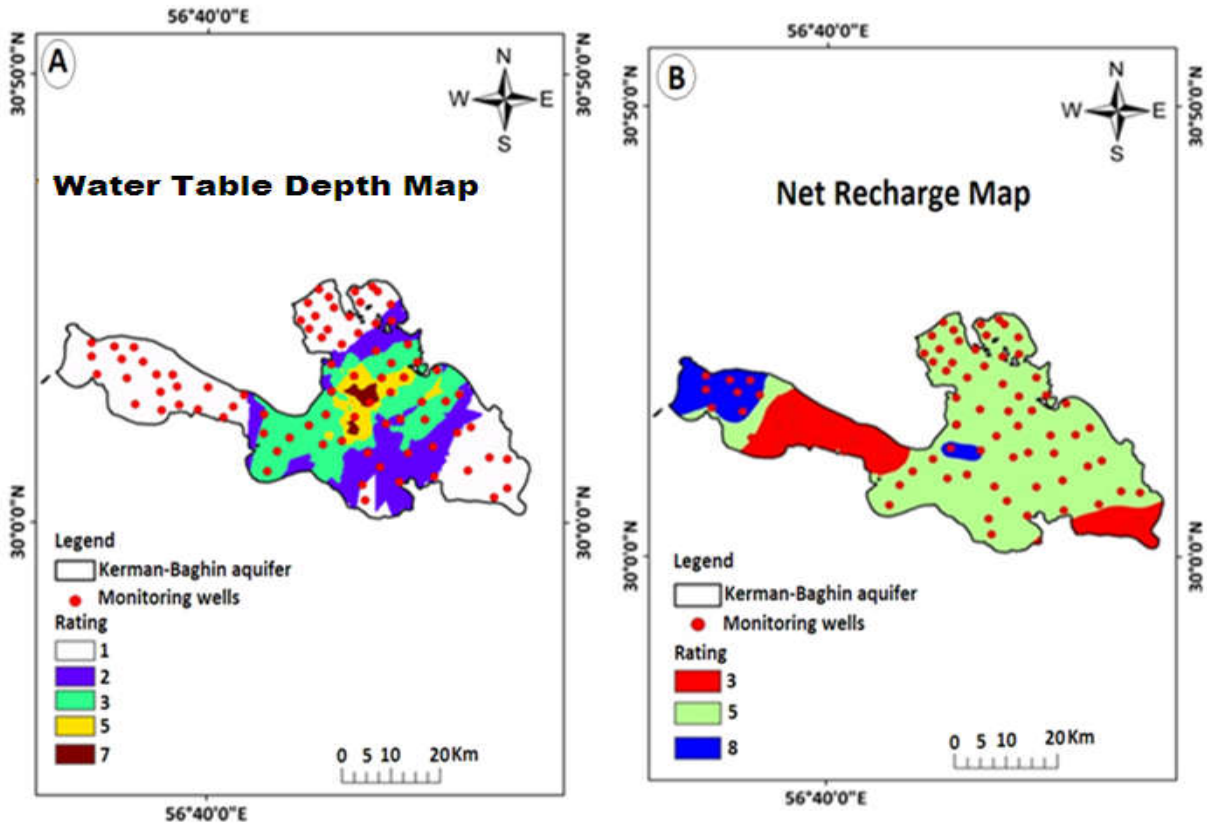

292

293 **Fig. 2.** Kerman–Baghin aquifer rated maps of A) water table depth and B) net recharge



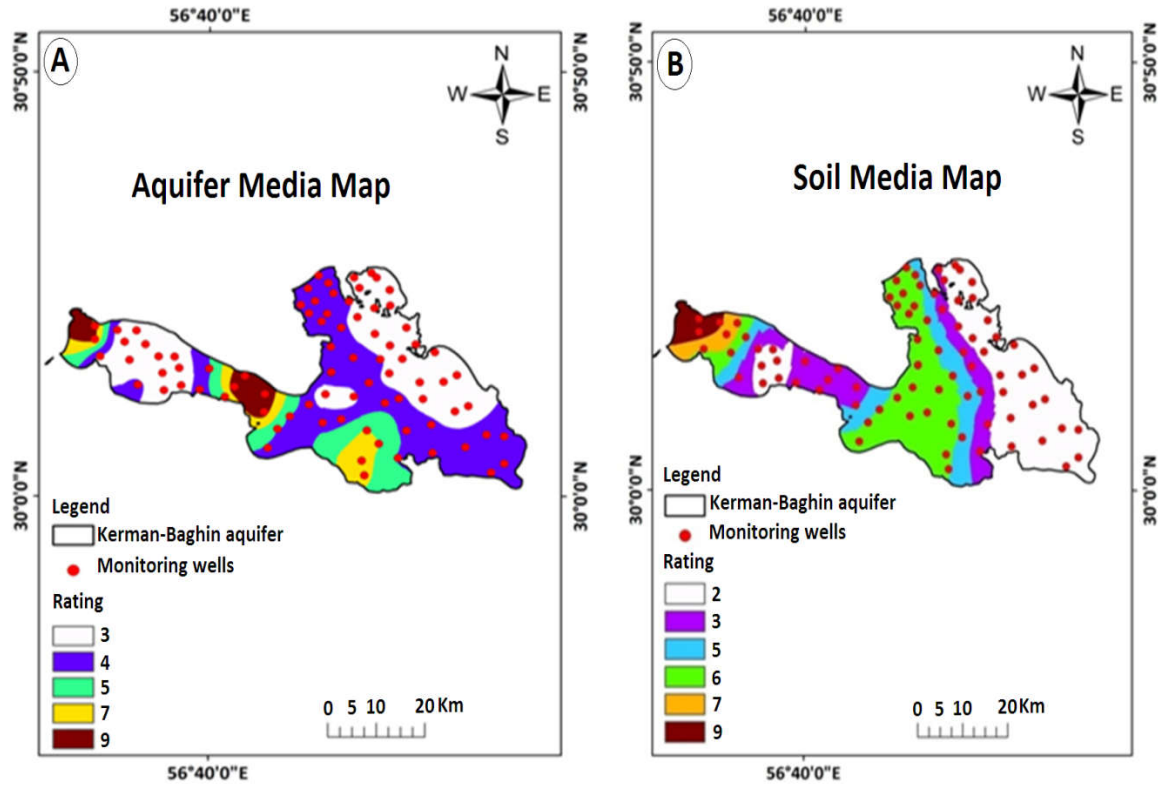

294

295 **Fig. 3.** Kerman–Baghin aquifer rated maps of A) aquifer media and B) soil media

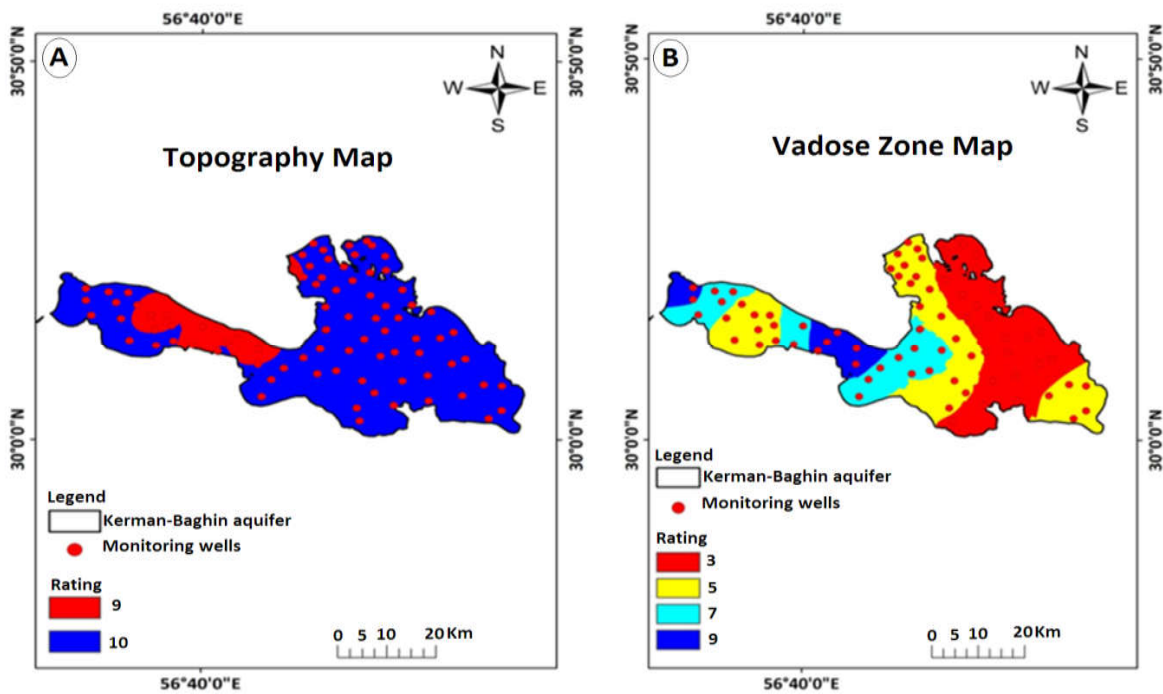

296

297 **Fig. 4.** Kerman–Baghin aquifer rated maps of A) topography and B) vadose zone

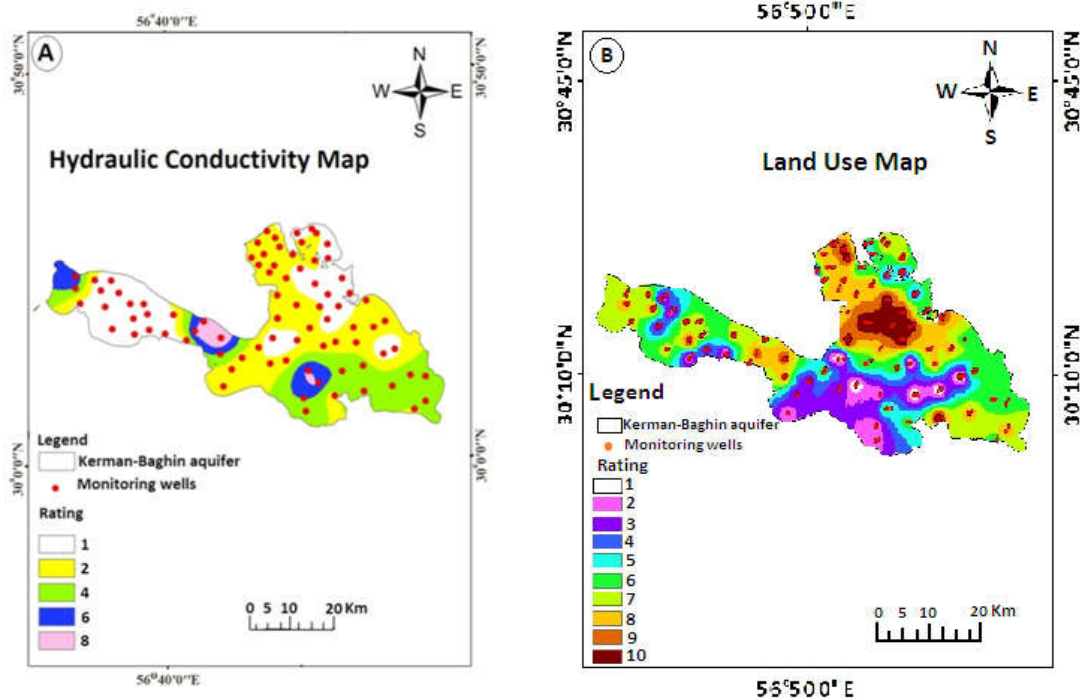

298

299 **Fig. 5.** Kerman–Baghin aquifer rated maps of A) hydraulic conductivity and B) land use

300 **Table 6** The area of rating (km<sup>2</sup> and %) of the DRASTIC and CDRASTIC parameters

| DRASTIC and CDRASTIC indexes parameters | Rating | Area (km <sup>2</sup> ) | Area (%) | The aquifer geographic directions covered by the respective rating in the parameters rated maps |
|-----------------------------------------|--------|-------------------------|----------|-------------------------------------------------------------------------------------------------|
| <b>Water table depth</b>                | 1      | 557.73                  | 27.55    | Parts of the north, south, northwest, and southeast                                             |
|                                         | 2      | 472.18                  | 23.34    | Parts of the north, south, and center                                                           |
|                                         | 3      | 469.78                  | 23.29    | Parts of the center                                                                             |
|                                         | 5      | 395.00                  | 19.53    | Parts of the center                                                                             |
|                                         | 7      | 129.14                  | 6.39     | Parts of the center                                                                             |
| <b>Net recharge</b>                     | 3      | 252.04                  | 12.45    | Parts of southeast, and northwest                                                               |
|                                         | 5      | 1534.15                 | 75.81    | North, northeast, south, southwest, and parts of the northwest, center, southeast               |
|                                         | 8      | 237.6                   | 11.74    | Parts of the northwest and center                                                               |
| <b>Aquifer media</b>                    | 3      | 743.18                  | 36.72    | Parts of the north, northwest, northeast, and center                                            |
|                                         | 4      | 779.01                  | 38.49    | Parts of the north, northwest, southeast, and center                                            |
|                                         | 5      | 207.81                  | 10.26    | Parts of the south, and northwest                                                               |
|                                         | 7      | 181.02                  | 8.95     | Parts of the south, and northwest                                                               |
|                                         | 9      | 112.76                  | 5.58     | Parts of the northwest                                                                          |
| <b>Soil media</b>                       | 2      | 658.5                   | 32.53    | Parts of the north, northwest, northeast, and southeast                                         |
|                                         | 3      | 399.72                  | 19.75    | Parts of the north, northwest, south, and center                                                |

|                                      |    |         |       |                                                                      |
|--------------------------------------|----|---------|-------|----------------------------------------------------------------------|
|                                      | 5  | 297.44  | 14.69 | Parts of the north, northwest, south, and center                     |
|                                      | 6  | 538.77  | 26.62 | Parts of the northwest, center, and southwest                        |
|                                      | 7  | 67.56   | 3.33  | Parts of the northwest                                               |
|                                      | 9  | 61.79   | 3.08  | Parts of the northwest                                               |
| <b>Topography</b>                    | 9  | 702.74  | 34.72 | North, northwest, northeast, south, southeast, southwest, and center |
|                                      | 10 | 1321.07 | 65.28 | parts of the northwest                                               |
| <b>The impact of the vadose zone</b> | 3  | 692.87  | 34.24 | Parts of the north, northeast, south, and southeast                  |
|                                      | 5  | 717.91  | 35.47 | Parts of the north, northwest, south, southeast, and center          |
|                                      | 7  | 412.49  | 20.39 | Parts of the center, and northwest                                   |
|                                      | 9  | 200.53  | 9.9   | Parts of the northwest                                               |
| <b>Hydraulic conductivity</b>        | 1  | 597.11  | 29.51 | Parts of the northeast, northwest, southeast, and center             |
|                                      | 2  | 774.52  | 38.27 | parts of the northwest, south, southeast, and center                 |
|                                      | 4  | 484.17  | 23.93 | Parts of the northwest, south, and southeast                         |
|                                      | 6  | 120.99  | 5.98  | Parts of the south, and northwest                                    |
|                                      | 8  | 46.7    | 2.31  | Parts of the south, and northwest                                    |
| <b>Land use</b>                      | 1  | 112.48  | 5.56  | Parts of the south                                                   |
|                                      | 2  | 165.02  | 8.16  | Parts of the south                                                   |
|                                      | 3  | 205.65  | 10.17 | Parts of the south, and center                                       |
|                                      | 4  | 357.06  | 17.64 | Parts of the south, southwest, northwest, and center                 |
|                                      | 5  | 234.86  | 11.61 | Parts of the southeast, northwest, and center                        |
|                                      | 6  | 413.86  | 20.45 | Parts of the southeast, northwest, northeast, and center             |
|                                      | 7  | 182.63  | 9.02  | Parts of the north, northwest, and northeast                         |
|                                      | 8  | 169.4   | 8.37  | Parts of the north, northwest, and northeast                         |
|                                      | 9  | 109.42  | 5.41  | Parts of the north, northwest, and northeast                         |
|                                      | 10 | 73.09   | 3.61  | Parts of the north                                                   |

### 301 **3.2. DRASTIC and CDRASTIC vulnerability indexes**

302 The Kerman–Baghin aquifer vulnerability map using DRASTIC and CDRASTIC indexes is  
303 shown in Fig 6. In the studied aquifer, the vulnerability falls under very high, high, moderate,  
304 low, and very low vulnerable areas. It is found that in both indexes, the parts of north, northeast,  
305 northwest, south, southwest, southeast and center come under low and very low vulnerability.  
306 This can be attributed to low water depth, hydraulic conductivity, and net recharge characterizing

307 these aquifer areas; an other reason might be that the aquifer media mostly are mostly clay, sand  
308 and silt soils. The area of the vulnerability, identified by investigated indexes, is illustrated in  
309 Tab 7. Low and very low vulnerable zones cover 25.21% and 38.31%, respectively, of the  
310 Kerman–Baghin aquifer using the DRASTIC index. Very low and low vulnerable zones cover  
311 24.95% and 40.41%, respectively, using the CDRASTIC index. This is primarily due to water  
312 table depth and relatively low permeability of the vadose zone in such aquifers (Colins et al.,  
313 2016). Around 26 % of the studied aquifer has moderate groundwater pollution potential, using  
314 DRASTIC and CDRASTIC indexes. This does not mean that such areas are without pollution  
315 but it is relatively prone to pollution when compared with other areas (Colins et al., 2016). From  
316 the DRASTIC index values, it was noticed that 10.4% of the study aquifer is under high (8.46%)  
317 and very high (1.94%) vulnerability. The results of the study showed that 8.75% of the aquifer is  
318 in the ranges of 190 to 235 and greater than 235 in the CDRASTIC index (Tab 7). The  
319 vulnerability maps according to these two indexes indicated very same findings, showing the  
320 northwest portion of the aquifer as the high and very high vulnerable zones. The high  
321 vulnerability can be attributed to great water depth, hydraulic conductivity, and net recharge in  
322 these aquifer areas. In addition, this can due to the great slope in this area.

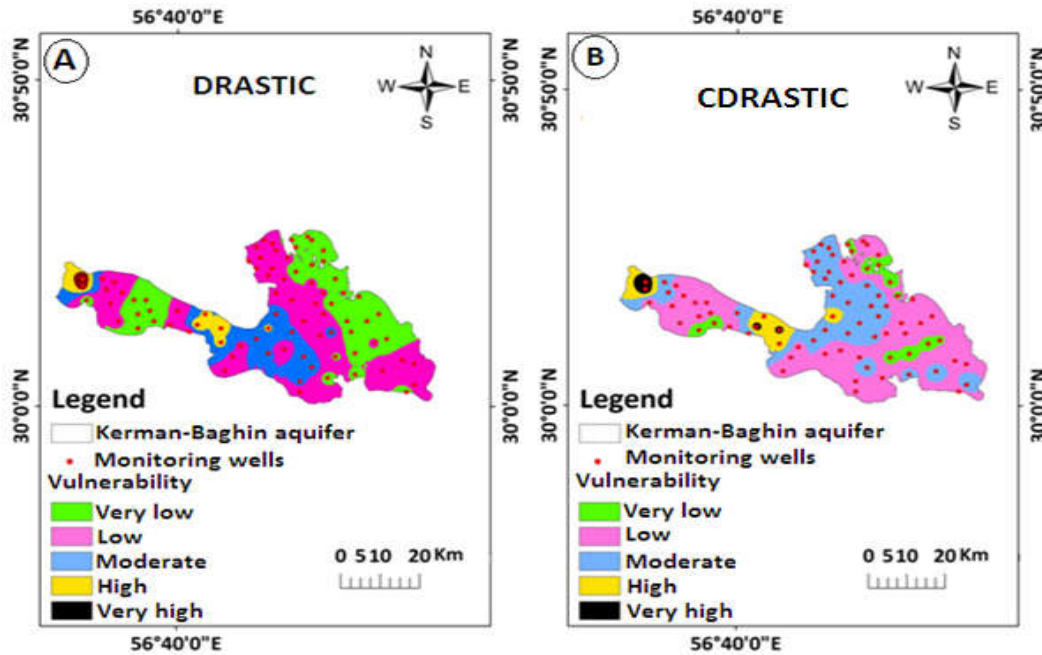

323  
 324 **Fig. 6.** The vulnerability maps of the Kerman–Baghin aquifer by DRASTIC and CDRASTIC  
 325 indexes

326 **Table 7** The area of vulnerability (km<sup>2</sup> and %) identified by DRASTIC and CDRASTIC indexes

| Vulnerability | DRASTIC |                         |          |                                                                                   | CDRASTIC |                         |          |                                                                                   |
|---------------|---------|-------------------------|----------|-----------------------------------------------------------------------------------|----------|-------------------------|----------|-----------------------------------------------------------------------------------|
|               | Ranges  | Area (km <sup>2</sup> ) | Area (%) | The aquifer geographic directions covered by the respective vulnerability         | Ranges   | Area (km <sup>2</sup> ) | Area (%) | The aquifer geographic directions covered by the respective vulnerability         |
| Very low      | 23-46   | 510.25                  | 25.21    | Parts of the south, north, northwest, and northeast                               | <100     | 505.02                  | 24.95    | Parts of the southeast, north, northwest, and northeast                           |
| Low           | 47-92   | 775.14                  | 38.31    | Parts of the south, southwest, southeast, north, northwest, northeast, and center | 100-145  | 817.70                  | 40.41    | Parts of the south, southwest, southeast, north, northwest, northeast, and center |
| Moderate      | 93-136  | 527.85                  | 26.08    | Parts of the south, southwest, northwest, and center                              | 145-190  | 524.06                  | 25.89    | Parts of the south, southwest, southwest, northwest, and center                   |
| High          | 137-184 | 171.02                  | 8.46     | Parts of the northwest                                                            | 190-235  | 126.91                  | 6.28     | Parts of the northwest and center                                                 |
| Very high     | >185    | 39.23                   | 1.94     | Parts of the northwest                                                            | ≥235     | 49.79                   | 2.47     | Parts of the northwest                                                            |

327  
 328 **3.3. The sensitivity of the DRASTIC model**  
 329 The MRSA, the DRASTIC index, is performed by eliminating one layer data at a time as  
 330 indicated in Tab 8. The results showed a high variation in vulnerability index when the impact of

331 the vadose zone factor was removed, so that, the average variation index is 1.88%. This shows  
332 that this factor is more effective in vulnerability assessment using the DRASTIC index. When  
333 this parameter is removed from the overlay process, this leads to a significant decrease in  
334 vulnerability index. This could be due to the high theoretical weight assigned to this factor  
335 (weight = 5). These findings are similar to those obtained by Dibi et al. (2012) who have shown  
336 that, in addition to this parameter, topography, net recharge, and water table depth have a high  
337 impact on the vulnerability index. Also, in Samake et al. (2011), the impact of the vadose zone  
338 and the hydraulic conductivity parameters had a considerable impact on the vulnerability index,  
339 that appears to have a moderate sensitivity to the deletion of water table depth (1.48%), net  
340 recharge (1.36%), and hydraulic conductivity (1.25%) parameters. The minimum menu variation  
341 index was achieved after eliminating the aquifer media factor (0.44%), as indicated in Tab 8.

342 For the estimation of the individual factors effect towards aquifer vulnerability, the SPSA is  
343 performed. The results summaries of SPSA in the DRASTIC index are shown in Tab 9. The  
344 SPSA compares the effective weights and theoretical weights. The average value of the effective  
345 weight of the net recharge factor is 43.26% and its theoretical weight (%) is 17.4%. This shows  
346 that this factor is more effective in vulnerability assessment using the DRASTIC index. The  
347 results reported by other studies (Babiker et al., 2005; Doumouya et al., 2012) are similar to  
348 those of the present study. The impact of the vadose zone and water table depth parameters has  
349 high theoretical weights (21.74%); they have been dedicated with an effective weight with  
350 average value such as 8.33% and 25.55%. The remaining factors show an average value of the  
351 effective weights of 14.91% (aquifer media), 9.89% (soil media), 11.35% (topography), and  
352 7.01% (hydraulic conductivity). The theoretical weights assigned to the water table depth, net  
353 recharge, topography, and hydraulic conductivity parameters are not in agreement with the

354 effective weight. The highest and lowest impact on aquifer vulnerability was related to the net  
 355 recharge and hydraulic conductivity parameters, respectively (Tab 9).

356 **Table 8** Statistical results of MRSA in the DRASTIC index

| The sensitivity of variability index (S) (%) |      |      |      | Removed parameters |
|----------------------------------------------|------|------|------|--------------------|
| SD                                           | Min. | Max. | Ave. |                    |
| 0.414                                        | 0.05 | 2.36 | 1.36 | D                  |
| 0.775                                        | 0.07 | 3.06 | 1.48 | R                  |
| 0.311                                        | 0.05 | 1.31 | 0.44 | A                  |
| 0.486                                        | 0.00 | 1.65 | 0.73 | S                  |
| 0.339                                        | 0.03 | 1.31 | 0.51 | T                  |
| 0.894                                        | 0.25 | 3.84 | 1.88 | I                  |
| 0.550                                        | 0.03 | 1.98 | 1.25 | C                  |

357

358 **Table 9** Statistical results of SPSA in the DRASTIC index

| Effective weight (%) |       |       |       | Theoretical weight (%) | Theoretical weight | Parameters |
|----------------------|-------|-------|-------|------------------------|--------------------|------------|
| SD                   | Min.  | Max.  | Ave.  |                        |                    |            |
| 6.179                | 3.23  | 28.46 | 8.33  | 21.74                  | 5                  | D          |
| 11.998               | 14.06 | 73.47 | 43.26 | 17.4                   | 4                  | R          |
| 3.190                | 7.26  | 22.13 | 14.91 | 13.04                  | 3                  | A          |
| 2.916                | 4.49  | 14.29 | 9.89  | 8.7                    | 2                  | S          |
| 2.222                | 6.45  | 14.71 | 11.35 | 4.3                    | 1                  | T          |
| 5.367                | 15.79 | 37.31 | 25.55 | 21.74                  | 5                  | I          |
| 3.738                | 2.42  | 18.75 | 7.01  | 13.04                  | 3                  | C          |

359

### 360 3.4. The sensibility of the CDRASTIC index

361 The MRSA in the CDRASTIC index is performed by eliminating on data layer at a time as  
 362 indicated in Tab 10. The mean variation index of hydraulic conductivity parameter is 4.13%. The  
 363 hydraulic conductivity has a greater effect on the aquifer vulnerability followed by water table  
 364 depth (4.05%), soil media (3.82%), topography (3.68%), aquifer media (3.28%), net recharge  
 365 (2.72%), the impact of the vadose zone (2.33%), and land use (1.99%).

366 The effective weight derived from the SPSA to the CDRASTIC index is shown in Tab 11.  
 367 The average value of the effective weight of the net recharge factor is 32.62%. This shows that  
 368 this factor is more effective in vulnerability assessment using CDRASTIC index. The hydraulic



369 conductivity displays the lowest effective weights (5.32%). The topography, net recharge, and  
 370 land use had upper effective weights toward the theoretical weights specified by CDRASTIC  
 371 index. The average value of the effective weight of the land use parameter is 24.82%. This shows  
 372 that this parameter is the second effective parameter in aquifer vulnerability, using the  
 373 CDRASTIC index (Tab 11).

374 **Table 10** Statistical results of MRSA in the CDRASTIC index

| SD    | The sensitivity of variability index (S) (%) |       |      | Removed parameters |
|-------|----------------------------------------------|-------|------|--------------------|
|       | Min.                                         | Max.  | Ave. |                    |
| 1.403 | 0.50                                         | 6.48  | 4.05 | D                  |
| 1.617 | 0.11                                         | 10.91 | 2.72 | R                  |
| 1.541 | 0.06                                         | 5.99  | 3.28 | A                  |
| 1.508 | 0.67                                         | 6.60  | 3.82 | S                  |
| 1.353 | 0.87                                         | 5.87  | 3.68 | T                  |
| 1.439 | 0.06                                         | 5.12  | 2.33 | I                  |
| 1.480 | 0.55                                         | 6.72  | 4.13 | C                  |
| 0.375 | 1.23                                         | 3.00  | 1.99 | L                  |

375

376 **Table 11** Statistical results of SPSA in the CDRASTIC index

| SD     | Effective weight (%) |       |       | Theoretical weight (%) | Theoretical weight | Parameters |
|--------|----------------------|-------|-------|------------------------|--------------------|------------|
|        | Min.                 | Max.  | Ave.  |                        |                    |            |
| 4.849  | 2.63                 | 26.88 | 6.27  | 21.74                  | 5                  | D          |
| 10.672 | 10.4                 | 66.67 | 32.62 | 17.4                   | 4                  | R          |
| 3.026  | 6.29                 | 20.00 | 11.23 | 13.04                  | 3                  | A          |
| 2.621  | 3.31                 | 12.96 | 7.5   | 8.7                    | 2                  | S          |
| 1.609  | 5.2                  | 12.82 | 8.45  | 4.3                    | 1                  | T          |
| 4.648  | 10.87                | 32.05 | 19.2  | 21.74                  | 5                  | I          |
| 3.134  | 2.1                  | 14.88 | 5.32  | 13.04                  | 3                  | C          |
| 10.122 | 3.88                 | 42.37 | 24.82 | 17.85                  | 5                  | L          |

377

#### 378 4. Conclusions

379 Evaluations of vulnerability indexes for the Kerman–Baghin aquifer were conducted using the  
 380 GIS-based DRASTIC and CDRASTIC indexes. Seven hydro–geological factors (the letters  
 381 comprising the acronym) ~~are applied to determine~~ <sup>were considered</sup> aquifer vulnerability with DRASTIC; ~~eight~~ <sup>four of</sup>  
 382 hydro–geological parameters ~~(one additional to the seven in DRASTIC)~~ <sup>in the</sup> ~~with~~ <sup>in</sup> the CDRASTIC  
~~were considered~~



Approach

383 ~~index~~. From the DRASTIC index values, it was determined that 10.4% of the aquifer is under  
384 high (8.46%) ~~and~~ <sup>TO</sup> very high (1.94%) vulnerability. From the CDRASTIC index values, it was  
385 determined that 8.75% of the aquifer is under high (6.28%) ~~and~~ <sup>TO</sup> very high (2.47%) vulnerability.  
386 Also, we found that parts of the north, south, southeast, and northwest ~~are under~~ <sup>HAVE</sup> low ~~and~~ <sup>TO</sup> very  
387 low vulnerability ~~using~~ <sup>BASED ON</sup> the DRASTIC and CDRASTIC indexes. Agricultural and industrial  
388 activities ~~are found to be~~ <sup>WERE THOUGHT</sup> a major threat <sup>TO</sup> in the zones with high ~~and~~ very high vulnerability. The <sup>NO SUPPORT FOR THIS</sup> ~~conclusion~~  
389 MRSA signifies the fact that hydraulic conductivity and the impact of the vadose zone ~~factors~~  
390 induce a high risk of aquifer contamination according to the DRASTIC and CDRASTIC indexes,  
391 respectively. ~~In both indexes~~ <sup>FOR METHODS</sup>, the SPSA analysis shows the net recharge <sup>has</sup> factor as a high risk for  
392 aquifer contamination. These results indicate that the studied indexes are effective tools for  
393 determining groundwater vulnerability. Also, these results could be utilized by private and  
394 government agencies as a guide for groundwater contamination assessment in Iran.

## 395 Acknowledgments

396 The authors would like to thank the Environmental Health Engineering Research Center,  
397 Kerman University of Medical Sciences, for their scientific support.

398 **Competing interests.** The authors declare that they have no conflict of interest.

## 399 References

400 Aller, L., Truman, b., Jay H, L., Rebecca J, P., and Glen, H.: DRASTIC: a standardized system  
401 for evaluating ground water pollution potential using hydrogeologic settings, U.S Environmental  
402 Protection Agency, USA, 1985.

403 Ayazi, M. H., Pirasteh, S., Arvin, A., Pradhan, B., Nikouravan, B., and Mansor, S.: Disasters and  
404 risk reduction in groundwater: Zagros Mountain Southwest Iran using geoinformatics  
405 techniques, *Disaster Adv.*, 3, 51-57, 2010.

406 Baalousha, H.: Vulnerability assessment for the Gaza Strip, Palestine using DRASTIC, *J.*  
407 *Environ. Geol.*, 50, 405-414, <https://doi.org/10.1007/s00254-006-0219-z>, 2006.

408 Babiker, I. S., Mohamed, M. A., Hiyama, T., and Kato, K.: A GIS-based DRASTIC model for  
409 assessing aquifer vulnerability in Kakamigahara Heights, Gifu Prefecture, central Japan, *Sci*  
410 *Total Environ.*, 345, 127-140, <https://doi.org/10.1016/j.scitotenv.2004.11.005>, 2005.

411 Baghapour, M. A., Talebbeydokhti, N., Tabatabae, H., and Nobandegani, A. F.: Assessment of  
412 groundwater nitrate pollution and determination of groundwater protection zones using  
413 DRASTIC and composite DRASTIC (CD) models: the case of Shiraz unconfined aquifer, *J.*  
414 *Health. Sci. Surveill. Syst.*, 2, 54-65, 2014.

415 Baghapour, M. A., Nobandegani, A. F., Talebbeydokhti, N., Bagherzadeh, S., Nadiri, A. A.,  
416 Gharekhani, M., and Chitsazan, N.: Optimization of DRASTIC method by artificial neural  
417 network, nitrate vulnerability index, and composite DRASTIC models to assess groundwater  
418 vulnerability for unconfined aquifer of Shiraz Plain, Iran, *J Environ Health Sci Eng.*, 14, 1-16,  
419 <https://doi.org/10.1186/s40201-016-0254-y>, 2016.

420 Barber, C., Bates, L. E., Barron, R., and Allison, H.: Assessment of the relative vulnerability of  
421 groundwater to pollution: a review and background paper for the conference workshop on  
422 vulnerability assessment, *AGSO J Aust Geol Geophys.*, 14, 147-154, 1993.

423 Boughriba, M., Barkaoui, A.-e., Zarhloule, Y., Lahmer, Z., El Houadi, B., and Verdoya, M.:  
424 Groundwater vulnerability and risk mapping of the Angad transboundary aquifer using

425 DRASTIC index method in GIS environment, Arab J Geosci., 3, 207-220,  
426 <https://doi.org/10.1007/s12517-009-0072-y>, 2010.

427 Chitsazan, M., and Akhtari, Y.: Evaluating the potential of groundwater pollution in Kherran and  
428 Zoweircherry plains through GIS-based DRASTIC model, J. Water. Wastewater, 17, 39-51,  
429 2006.

430 Chitsazan, M., and Akhtari, Y.: A GIS-based DRASTIC model for assessing aquifer  
431 vulnerability in Kherran Plain, Khuzestan, Iran, Water Resour Manag., 23, 1137-1155,  
432 <https://doi.org/10.1007/s11269-008-9319-8>, 2009.

433 Colins, J., Sashikkumar, M., Anas, P., and Kirubakaran, M.: GIS-based assessment of aquifer  
434 vulnerability using DRASTIC Model: A case study on Kodaganar basin, Earth Sci. Res. J., 20, 1-  
435 8, <https://doi.org/10.15446/esrj.v20n1.52469>, 2016.

436 Daly, D., and Drew, D.: Irish methodologies for karst aquifer protection, in: Beek B (ed)  
437 Hydrogeology and engineering geology of sinkholes and karst, Balkema, Rotterdam, 267-272,  
438 1999.

439 Dibi, B., Kouame, K. I., Konan-Waidhet, A. B., Savane, I., Biemi, J., Nedeff, V., and Lazar, G.:  
440 Impact of agriculture on the quality of groundwater resources in peri-urban zone of Songon  
441 (Cote D'ivoire), Environ. Engine. Manage. J., 11, 2173-2182,  
442 <https://doi.org/10.30638/eemj.2012.271>, 2012.

443 Dixon, B.: Prediction of ground water vulnerability using an integrated GIS-based Neuro-Fuzzy  
444 techniques, J. Spat. Hydro., 4, 1-38, 2004.

445 Doumouya, I., Dibi, B., Kouame, K. I., Saley, B., Jourda, J. P., Savane, I., and Biemi, J.:  
446 Modelling of favourable zones for the establishment of water points by geographical information

447 system (GIS) and multicriteria analysis (MCA) in the Aboisso area (South-east of Côte d'Ivoire),  
448 Environ. Earth. Sci., 67, 1763-1780, <https://doi.org/10.1007/s12665-012-1622-2>, 2012.

449 Ghazavi, R., and Ebrahimi, Z.: Assessing groundwater vulnerability to contamination in an arid  
450 environment using DRASTIC and GOD models, *Inte. J. Environ. Sci. Tech*, 12, 2909-2918,  
451 <https://doi.org/10.1007/s13762-015-0813-2>, 2015.

452 Ghosh, T., and Kanchan, R.: Aquifer vulnerability assessment in the Bengal alluvial tract, India,  
453 using GIS based DRASTIC model, *Model Earth Syst Environ.*, 2, 2-13,  
454 <https://doi.org/10.1007/s40808-016-0208-5>, 2016.

455 Israil, M., Al-hadithi, M., Singhal, D., Kumar, B., Rao, M. S., and Verma, S.: Groundwater  
456 resources evaluation in the Piedmont zone of Himalaya, India, using Isotope and GIS techniques,  
457 *J. Spatial. Hydro.*, 6, 107-119, 2006.

458 Jaiswal, R., Mukherjee, S., Krishnamurthy, J., and Saxena, R.: Role of remote sensing and GIS  
459 techniques for generation of groundwater prospect zones towards rural development--an  
460 approach, *Int J Remote Sens.*, 24, 993-1008, <https://doi.org/10.1080/01431160210144543>, 2003.

461 Jaseela, C., Prabhakar, K., and Harikumar, P. S. P.: Application of GIS and DRASTIC modeling  
462 for evaluation of groundwater vulnerability near a solid waste disposal site, *Int. J. Geosci.*, 7,  
463 558-571, <https://doi.org/10.4236/ijg.2016.74043>, 2016.

464 Javadi, S., Kavehkar, N., Mousavizadeh, M., and Mohammadi, K.: Modification of DRASTIC  
465 model to map groundwater vulnerability to pollution using nitrate measurements in agricultural  
466 areas, *J. Agr. Sci. Tech.*, 13, 239-249, 2010.

467 Javadi, S., Kavehkar, N., Mohammadi, K., Khodadadi, A., and Kahawita, R.: Calibrating  
468 DRASTIC using field measurements, sensitivity analysis and statistical methods to assess

469 groundwater vulnerability, *Water. Int.*, 36, 719-732,  
470 <https://doi.org/10.1080/02508060.2011.610921>, 2011.

471 Jayasekera, D., Kaluarachchi, J. J., and Villholth, K. G.: Groundwater Quality Impacts Due to  
472 Population Growth and Land Use Exploitation in the Coastal Aquifers of Sri Lanka, Southern  
473 Illinois University Carbondale 2008, 43.

474 Jayasekera, D. L., Kaluarachchi, J. J., and Villholth, K. G.: Groundwater stress and vulnerability  
475 in rural coastal aquifers under competing demands: a case study from Sri Lanka, *Environ Monit*  
476 *Assess.*, 176, 13-30, <https://doi.org/10.1007/s10661-010-1563-8>, 2011.

477 Kardan Moghaddam, H., Jafari, F., and Javadi, S.: Vulnerability evaluation of a coastal aquifer  
478 via GALDIT model and comparison with DRASTIC index using quality parameters, *Hydro. Sci.*  
479 *J.*, 62, 137-146, <https://doi.org/10.1080/02626667.2015.1080827>, 2017.

480 Kumar, P., Thakur, P. K., Bansod, B. K., and Debnath, S. K.: Assessment of the effectiveness of  
481 DRASTIC in predicting the vulnerability of groundwater to contamination: a case study from  
482 Fatehgarh Sahib district in Punjab, India, *Environ. Earth. Sci.*, 75, 879,  
483 <https://doi.org/10.1007/s12665-016-5712-4>, 2016.

484 Madrucci, V., Taioli, F., and de Araújo, C. C.: Groundwater favorability map using GIS  
485 multicriteria data analysis on crystalline terrain, Sao Paulo State, Brazil, *J. Hydro.*, 357, 153-173,  
486 <https://doi.org/10.1016/j.jhydrol.2008.03.026>, 2008.

487 Manap, M. A., Sulaiman, W. N. A., Ramli, M. F., Pradhan, B., and Surip, N.: A knowledge-  
488 driven GIS modeling technique for groundwater potential mapping at the Upper Langat Basin,  
489 Malaysia, *Arabian. J. Geosci.*, 6, 1621-1637, <https://doi.org/10.1007/s12517-011-0469-2>, 2013.

490 Manap, M. A., Nampak, H., Pradhan, B., Lee, S., Sulaiman, W. N. A., and Ramli, M. F.:  
491 Application of probabilistic-based frequency ratio model in groundwater potential mapping using

492 remote sensing data and GIS, *Arabian. J.Geosci.*, 7, 711-724, <https://doi.org/10.1007/s12517->  
493 012-0795-z, 2014a.

494 Manap, M. A., Nampak, H., Pradhan, B., Lee, S., Sulaiman, W. N. A., and Ramli, M. F.:  
495 Application of probabilistic-based frequency ratio model in groundwater potential mapping using  
496 remote sensing data and GIS, *Arabian. J. Geosci.*, 7, 711-724, <https://doi.org/10.1007/s12517->  
497 012-0795-z, 2014b.

498 Martínez-Bastida, J. J., Arauzo, M., and Valladolid, M.: Intrinsic and specific vulnerability of  
499 groundwater in central Spain: the risk of nitrate pollution, *Hydro. J.*, 18, 681-698,  
500 <https://doi.org/10.1007/s10040-009-0549-5>, 2010.

501 Merchant, J. W.: GIS-based groundwater pollution hazard assessment: a critical review of the  
502 DRASTIC model, *Photogramm Eng Remote Sensing.*, 60, 1117-1127, 1994.

503 Modabberi, H., Hashemi, M. M. R., Ashournia, M., and Rahimpour, M. A.: Sensitivity Analysis  
504 and Vulnerability Mapping of the Guilan Aquifer Using Drastic Method, *Rev. Environ. Earth.*  
505 *Sci.*, 4, 27-41, <https://doi.org/10.18488/journal.80.2017.41.27.41>, 2017.

506 Napolitano, P., and Fabbri, A.: Single-parameter sensitivity analysis for aquifer vulnerability  
507 assessment using DRASTIC and SINTACS, *Proceedings of the Vienna Conference,*  
508 *Netherlands*, 1996, 559-566,

509 Neshat, A., Pradhan, B., Pirasteh, S., and Shafri, H. Z. M.: Estimating groundwater vulnerability  
510 to pollution using a modified DRASTIC model in the Kerman agricultural area, Iran, *Environ.*  
511 *Earth. Sci.*, 71, 3119-3131, <https://doi.org/10.1007/s12665-013-2690-7>, 2014.

512 Neshat, A., and Pradhan, B.: Evaluation of groundwater vulnerability to pollution using  
513 DRASTIC framework and GIS, *Arabian. J. Geosci.*, 10, 2-8, <https://doi.org/10.1007/s12517-017->  
514 3292-6, 2017.

515 Raju, N. J., Ram, P., and Gossel, W.: Evaluation of groundwater vulnerability in the lower  
516 Varuna catchment area, Uttar Pradesh, India using AVI concept, *J. Geol. Soc. India.*, 83, 273-  
517 278, <https://doi.org/10.1007/s12594-014-0039-9>, 2014.

518 Saida, S., Tarik, H., Abdellah, A., Farid, H., and Hakim, B.: Assessment of groundwater  
519 vulnerability to nitrate based on the optimised DRASTIC models in the GIS Environment (Case  
520 of Sidi Rached Basin, Algeria), *Geosciences*, 7, 2-23,  
521 <https://doi.org/10.3390/geosciences7020020>, 2017.

522 Saidi, S., Bouri, S., and Ben Dhia, H.: Sensitivity analysis in groundwater vulnerability  
523 assessment based on GIS in the Mahdia-Ksour Essaf aquifer, Tunisia: a validation study, *Hydro.*  
524 *Sci. J.*, 56, 288-304, <https://doi.org/10.1080/02626667.2011.552886>, 2011.

525 Samake, M., Tang, Z., Hlaing, W., Mbue, I. N., Kasereka, K., and Balogun, W. O.: Groundwater  
526 vulnerability assessment in shallow aquifer in Linfen Basin, Shanxi Province, China using  
527 DRASTIC model, *J. Sustain. Develop.*, 4, 53-71, <https://doi.org/10.5539/jsd.v4n1p53>, 2011.

528 Sarah, C., and Patricia I, C.: Ground water vulnerability assessment: Predicting relative  
529 contamination potential under conditions of uncertainty, National Academies Press, USA, 1993.

530 Secunda, S., Collin, M., and Melloul, A. J.: Groundwater vulnerability assessment using a  
531 composite model combining DRASTIC with extensive agricultural land use in Israel's Sharon  
532 region, *J. Environ. Manage.*, 54, 39-57, <https://doi.org/10.1006/jema.1998.0221>, 1998.

533 Shirazi, S. M., Imran, H., and Akib, S.: GIS-based DRASTIC method for groundwater  
534 vulnerability assessment: a review, *J. Risk. Res.*, 15, 991-1011,  
535 <https://doi.org/10.1080/13669877.2012.686053>, 2012.

536 Singh, A., Srivastav, S., Kumar, S., and Chakrapani, G. J.: A modified-DRASTIC model  
537 (DRASTICA) for assessment of groundwater vulnerability to pollution in an urbanized

538 environment in Lucknow, India, *Environ. Earth. Sci.*, 74, 5475-5490,  
539 <https://doi.org/10.1007/s12665-015-4558-5>, 2015.

540 Souleymane, K., and Tang, Z.: A novel method of sensitivity analysis testing by applying the  
541 DRASTIC and fuzzy optimization methods to assess groundwater vulnerability to pollution: the  
542 case of the Senegal River basin in Mali, *Nat. Hazards. Earth. Sys. Sci.*, 17, 1375-1392,  
543 <https://doi.org/10.5194/nhess-17-1375-2017>, 2017.

544 Srivastava, P. K., and Bhattacharya, A. K.: Groundwater assessment through an integrated  
545 approach using remote sensing, GIS and resistivity techniques: a case study from a hard rock  
546 terrain, *Int. J. Remote. Sens.*, 27, 4599-4620, <https://doi.org/10.1080/01431160600554983>,  
547 2006.

548 Tilahun, K., and Merkel, B. J.: Assessment of groundwater vulnerability to pollution in Dire  
549 Dawa, Ethiopia using DRASTIC, *Environ. Earth. Sci.*, 59, 1485-1496,  
550 <https://doi.org/10.1007/s12665-009-0134-1>, 2010.

551 Zghibi, A., Merzougui, A., Chenini, I., Ergaieg, K., Zouhri, L., and Tarhouni, J.: Groundwater  
552 vulnerability analysis of Tunisian coastal aquifer: an application of DRASTIC index method in  
553 GIS environment, *Groundwater. Sustain. Develop.*, 2, 169-181,  
554 <https://doi.org/10.1016/j.gsd.2016.10.001>, 2016.

555
